# Supplementary material for: Fall in C-Peptide During First 2 Years From Diagnosis: Evidence of at Least Two Distinct Phases From Composite Type 1 Diabetes TrialNet Data
Source: PubMed Central journal article supplement — Diabetes. 2012 Jul 17;61(8):2066–73. doi: 10.2337/db11-1538 (PMC3402330; doi:10.2337/db11-1538), 2012-07-17
Supplement: supp_db11-1538_DB111538SupplementaryData.pdf [file supp_db11-1538_DB111538SupplementaryData.pdf]

## SUPPLEMENTARY DATA

### Supplementary Material

C-peptide values recorded as below “Lower Limit of Detection” (LLD) were assigned the value of one-half the LLD. C-peptide AUC was calculated using the Trapezoidal method. Areas were then divided by the time period of the test, 120 minutes. The resulting AUC is then interpretable as “mean C-peptide” during the 2 hour test and this interpretation motivated the use of 1/2LLD.

Associations between C-peptide measures with baseline covariates were assessed with Spearman Correlation for continuous covariates and with ANOVA for categorical covariates.

Undetectable C-peptide on was defined as all timed values on the MMTT below the LLD. Non-significant decrease in C-peptide was defined either as the individual’s CV between values as less than or equal to the median CV (9.7%) or defined as less than 1 assay difference SD (0.2634) of the MMTT/GST study (10). The time course of the proportion of subjects with detectable C-peptide values and the proportion of subjects with peak C-peptide  $\geq 2.0$  pmol were estimated with the Kaplan Meier method.

The relationship of C-peptide across time with baseline covariates was evaluated with mixed linear models. The models included random effects for subject, time and the interaction of these two variables. In this way, slopes relating C-peptide and time were thus estimated for each individual subject. Slopes of C-peptide v. time were then estimated for subgroups defined by age quartiles using the mean slope of individuals in that group and the resulting estimates displayed in Fan Plots.

The joint influence of baseline covariates on the longitudinal change in C-peptide was assessed with multivariable models. Only covariates that were found significant ( $p < 0.05$ ) in univariable analysis were included in the multivariable models. The significance of variables was determined with Wald statistics.

Since our goal was to model the course of C-peptide across time, we elected to use all time points available in order to gain the widest range of time. We therefore did not include the initial or “baseline” value of C-peptide as a covariate in the model. However, our statistical models were nonetheless adjusted for baseline C-peptide in the following manner: Consider the univariable model  $E(Y) = \beta_0 + \beta_1 X + \beta_2 T + \beta_3 XT$  with covariate “X” and time variable “T”. At “baseline”,  $T=0$ , so that baseline C-peptide is estimated by the first two terms of the model. This estimate is included in each of the univariable and multivariable models and provides, therefore, a statistical adjustment for the starting value of C-peptide in our analyses.

Piecewise linear regression (Muggeo, 2003) was used to test the hypothesis that the slope of C-peptide AUC was the same before and after one year post baseline. The selection of the one-year time point for comparison was based on inspection of the plot of means across time and, therefore, this analysis is data driven.

To compare slopes between the three C-peptide endpoints (AUC, Peak and Fasting) a multivariate random effects linear model was fit. No covariate adjustment was used because multivariable analyses found different sets of covariates to be associated with each endpoint. The slopes were statistically compared using the multivariate Wilks' Lambda test. Following an overall significant test ( $p < .0001$ ), individual pair-wise comparisons of the slopes were accomplished with preplanned contrasts at the 5% level of significance.

Patterns of change from baseline were investigated using three definitions of “responder”. In two of the definitions, data from the MMTT/GST study were used to (a) determine assay variability and (b) the median Coefficient of Variation (CV) of the C-peptide AUC endpoint. The MMTT/GST study was a repeated measures study with two determinations taken on each subject approximately 1 week apart. Variance components analysis was used to estimate within subject variability of C-Peptide that was required for one responder definition, namely: any change from baseline  $\geq -1$  assay standard deviation. The other definition defined a

## SUPPLEMENTARY DATA

responder as occurring whenever the change in AUC was an increase, no change, or if the CV at the time point

(defined to be  $\sqrt{2} * \left| \frac{(Y_t - Y_0)}{(Y_t + Y_0)} \right|$ , where Y denotes AUC and t denotes time) was less than the median

CV of the MMTT/GST study, namely 0.097. The third definition is based on Herold (ref) who defined a responder as a subject whose follow-up C-peptide value was no more than 7.5% below baseline. Since the previous measures do not capture the pattern of serial changes, that is changes in C-peptide from one measurement to the next, we then considered the concept of a “rally” in which the change in two consecutive C-peptide AUC’s is such that the latter represents an increase of at least 1 assay standard deviation from the former. For each of these definitions of remission and rally, subjects were classified dichotomously as having none during the two year period or having at least one such event. These data were then analyzed with logistic regression.

It is important to note that log transformation of C-peptide AUC led to models in which time was no longer a statistically significant factor. These models were subsequently rejected since it is well established that C-peptide declines in time. Our data therefore suggests the relationship is not entirely linear or log-linear (in which decline is proportional in time).

“Spaghetti plots” suggested the presence of outliers. Using data from our previously published study of the reproducibility of MMTT, we calculated the standard deviation of the paired differences in AUC C-peptide and then, for each individual, compared their actual data to the line fit by the regression model for them. Those observations more than 1.96 SD’s from the line were characterized as unexpected and individuals with at least 3 data points meeting this criteria were classified as outliers. Statistically, we would expect 0.223% of the subjects to be classified as outliers simply by chance. However, 13 subjects or 6.8% were classified as outliers in our study. As there were no characteristics among these 13 individuals that distinguished them from the rest of the subjects, this suggests that lack of fit by the linear regression model on the untransformed C-peptide might account for the high frequency of subjects classified as outliers. In fact, inspection of residual plots revealed that while the model estimates are indeed very close to the observed values, there is a tendency to underestimate the rate of decline by the model.

## SUPPLEMENTARY DATA

### **Type 1 Diabetes TrialNet Study Group**

Steering Committee: Jay S. Skyler (University of Miami Diabetes Research Institute), Chairman; Mark Anderson (University of California San Francisco), Katarzyna Bourcier (NIAID), Dorothy Becker (University of Pittsburgh), Penelope Bingley (University of Bristol), Janice Blum (Indiana University), Emanuele Bosi (San Raffaele Hospital), Jane Buckner (Benaroya Research Institute), H. Peter Chase (University of Colorado Barbara Davis Center for Childhood Diabetes), Michael Clare-Salzler (University of Florida), Peter Colman (Walter and Eliza Hall Institute of Medical Research), Linda DiMeglio (Indiana University), George S. Eisenbarth (University of Colorado Barbara Davis Center for Childhood Diabetes), C. Garrison Fathman (Stanford University), Stephen Gitelman (University of California San Francisco), Robin Goland (Columbia University), Peter Gottlieb (University of Colorado Barbara Davis Center for Childhood Diabetes), Gilman Grave (NICHD), Carla Greenbaum (Benaroya Research Institute), Leonard Harrison (Walter and Eliza Hall Institute of Medical Research), Kevan Herold (Yale University), Richard Insel (Juvenile Diabetes Research Foundation), Jeffrey P. Krischer (University of South Florida), Jeffrey Mahon (University of Western Ontario), Jennifer Marks (University of Miami Diabetes Research Institute), Antoinette Moran (University of Minnesota), Jerry P. Palmer (University of Washington), Mark Peakman (Guy's, King's, and St. Thomas' School of Medicine), Alberto Pugliese (University of Miami Diabetes Research Institute), Philip Raskin (University of Texas Southwestern Medical School), Maria Grazia Roncarolo (San Raffaele Scientific Institute), William Russell (Vanderbilt University), Peter Savage (NIDDK), Desmond Schatz (University of Florida), Robert Sherwin (Yale University), Mark Siegelman (University of Texas Southwestern Medical School), Olli Simell (Hospital District of Southwest Finland), James Thomas (Vanderbilt University), Massimo Trucco (University of Pittsburgh), John Wagner (University of Minnesota), Diane Wherrett (University of Toronto), Darrell M. Wilson (Stanford University), William Winter (University of Florida), Judith Fradkin (NIDDK, ex-officio), Ellen Leschek (NIDDK, ex-officio), Lisa Spain (NIDDK, ex-officio).

Past Members: Christophe Benoist (Joslin Diabetes Center), Jeffrey Bluestone (University of California San Francisco), David Brown (University of Minnesota), Catherine Cowie (NIDDK), Bernard Hering (University of Minnesota), Stanley Jordan (Cedars-Sinai Medical Center), Francine R. Kaufman (Childrens Hospital Los Angeles), John M. Lachin (George Washington University), Kirsti Nanto-Salonen (Hospital District of Southwest Finland), Gerald Nepom (Benaroya Research Institute), Tihamer Orban (Joslin Diabetes Center), Robertson Parkman (Childrens Hospital Los Angeles), Mark Pescovitz† (Indiana University), John Peyman (NIAID), John Ridge (NIAID), Henry Rodriguez (Indiana University), Anette Ziegler (Institut für Diabetesforschung).

Executive Committee: Jay S. Skyler, Katarzyna Bourcier, Carla J. Greenbaum, Jeffrey P. Krischer, Ellen Leschek, Lisa Rafkin (University of Miami Diabetes Research Institute), Peter Savage, Lisa Spain.

Past Members: Catherine Cowie, Mary Foulkes (George Washington University), Heidi Krause-Steinrauf (George Washington University), John M. Lachin, Saul Malozowski (NIDDK), John Peyman, John Ridge, Stephanie J. Zafonte (George Washington University).

Chairman's Office: Jay S. Skyler, Carla J. Greenbaum, Norma S. Kenyon, Lisa Rafkin, Irene Santiago, Jay M. Sosenko

TrialNet Coordinating Center (University of South Florida): Jeffrey P. Krischer, Brian Bundy, AQesha Luvon Ritzie, Michael Abbondandolo, Timothy Adams, Persida Alies, Franz Badias, Craig Beam, Matthew Boonstra, David Boulware, David Cuthbertson, Christopher Eberhard, Julie Ford, Jinin Ginem, Heather Guillette, Brian Hays, Martha Henry, Pat Law, Cristin Linton, Shu Liu, Jennifer Lloyd, Sarah

## SUPPLEMENTARY DATA

Muller, Ryan O'Donnell, Yazandra Parrimon, Kate Paulus, Jennifer Pilger, Joy Ramiro, Amy Roberts, Kelly Sadler, Amanda Terry, Margaret Wootten, Ping Xu, Kenneth Young

Past Staff Members: Monica Bassi, Doug Freeman, Moriah Granger, Michelle Kieffer, Lavanya Nallamshetty, Audrey Shor

Previous Coordinating Center (George Washington University) (who were involved with study at time of initiation): John M. Lachin, Mary Foulkes, Pamela Harding, Heidi Krause-Steinrauf, Susan McDonough, Paula F. McGee, Kimberly Owens Hess, Donna Phoebus, Scott Quinlan, Erica Raiden

NIDDK Staff: Judith Fradkin, Ellen Leschek, Peter Savage, Lisa Spain

Data Safety and Monitoring Board: Emily Blumberg (University of Pennsylvania), Chair; Jonathan Braun (University of California Los Angeles), Lori Laffel (Joslin Diabetes Center), Ali Naji (University of Pennsylvania), Jorn Nerup (University of Copenhagen), Trevor Orchard (University of Pittsburgh), Anastasios Tsiatis (North Carolina State University), Robert Veatch (Georgetown University), Dennis Wallace (Research Triangle Institute).

Past Members: Ake Lernmark (Lund University), Bernard Lo (University of California San Francisco), Herman Mitchell (Rho Inc.), Michael Steffes (University of Minnesota), Bernard Zinman (University of Toronto).

Infectious Disease Safety Committee: Brett Loechelt (Children's National Medical Center) (Medical Monitor), Lindsey Baden (Harvard University), Michael Green (University of Pittsburgh), Adriana Weinberg (University of Colorado)

Laboratory Directors: George S. Eisenbarth, Santica Marcovina (University of Washington), Jerry P. Palmer, Adriana Weinberg, William Winter, Liping Yu (University of Colorado Barbara Davis Center for Childhood Diabetes), Sunanda Babu (University of Colorado Barbara Davis Center for Childhood Diabetes)

Clinical Center Staff involved in these Protocols:

Benaroya Research Institute, Seattle, Washington: Carla Greenbaum, Jennifer Bollyky, Srinath Sanda, David Tridgell, Marli McCulloch-Olson, Heather Vendettuoli, Deborah Hefty, Mary Ramey, Christine Webber, Kristen Kuhns, Nicole Hilderman, Angela Dove, Marissa Hammond, Jani Klein, Emily Batts

Childrens Hospital Los Angeles: Roshanak Monzavi, Mary Halvorson, Meredith Bock, Lynda Fisher, Debra Jeandron, Jamie Wood, Francine R. Kaufman

Columbia University, New York: Robin Goland, Ellen Greenberg, Mary Pat Gallagher, Jeniece Trast, Mary Chan

Indiana University, Indianapolis: Henry Rodriguez, Mark Pescovitz, Linda DiMeglio, Lyla Christner, Maria Nicholson, Martha Mendez

Joslin Diabetes Center, Boston: Tihamer Orban, Christophe Benoist, Joseph Wolfsdorf, Alyne Ricker, Heyam Jalahej, Debbie Conboy, Klara Farkas, Janos Kis, Hui Zhang, Steve Fay

## SUPPLEMENTARY DATA

Stanford University, California: Darrell M. Wilson, Bruce A. Buckingham, Tandy Aye, Trudy Esrey, Adriana Soto, Jennifer Perry, Bonita Baker, Alison Rigby, Barbara Berry

University of California San Francisco: Stephen E. Gitelman, Stephen M. Rosenthal, Mark Anderson, Saleh Adi, Kathleen Breen, Celia Hamilton

University of Colorado Barbara Davis Center for Childhood Diabetes, Aurora, Colorado: Peter Gottlieb, H. Peter Chase, Aaron Michels, Whitney Kastelic, Laurie Weiner

University of Florida, Gainesville, FL: Desmond Schatz, Michael Haller, Michael Clare-Salzler, Roberta Cook, Diane Mancini, Annie Abraham, Elena Hicks, Gloria Cole

University of Miami Diabetes Research Institute, Miami, Florida: Jennifer B. Marks, Alberto Pugliese, Della Matheson, Carlos Blaschke, Luz Arazo, Mario Cisneros, Brenda Acosta

University of Minnesota, Minneapolis: Antoinette Moran, Brandon Nathan, John Wagner, Mary Ann Boes, Carrie Gibson, Lois Finney, Theresa Albright-Fischer, Jennifer Smith

University of Pittsburgh, Pennsylvania: Dorothy Becker, Frederico Toledo, Ingrid Libman, Karen Riley, Kelli Delallo, Kym Smith, Diane Gwynn, Gyna Wohlers

University of Texas Southwestern Medical School: Philip Raskin, Perrin White, Bryan Dickson, Soumya Adhikari, Mark Siegelman, Marilyn Alford, Nenita Torres, Tauri Harden, Lourdes Pruneda, Erica Cordova, Renee Davis, Stefani Fernandez, Jamie Arthur

University of Toronto: Diane Wherrett, Lesley A. Eisel, Brenda Ahenkorah, Natasha Razack, Mithula Sriskandarajah

Vanderbilt University: William E. Russell, James W. Thomas, Daniel J. Moore, Anne Brown, Margo Black, Eric Pittel, Faith Brendle

SUPPLEMENTARY DATA

**Supplementary Table 1.** Correlation between data from 2 and 4 hour MMTT

|           | Peak<br>pmol/mL | AUC<br>pmol/mL | AUC<br>% Change from<br>baseline |
|-----------|-----------------|----------------|----------------------------------|
| Baseline  | 0.992           | 0.952          | -                                |
| 12 months | 0.998           | 0.986          | 0.960                            |
| 24 months | 0.997           | 0.990          | 0.981                            |

**Supplementary Table 2.** Comparison of Slopes (reduction across time) for the C-Peptide Endpoints

| C-Peptide<br>Endpoint | Mean<br>Reduction/Month* | SE         |
|-----------------------|--------------------------|------------|
| AUC                   | -0.051509054             | 0.00211122 |
| Maximum               | -0.066874744             | 0.00298705 |
| Fasting               | -0.022568375             | 0.00169631 |

\*slope of regression line.

Results presented are slopes from the regression of each endpoint on time, measured in months from start of study. Random effects regression models were used to accommodate correlations within subjects across time for each endpoint. The slopes were then statistically compared using the multivariate Wilks' Lambda test. Following an overall significant test ( $p < .0001$ ), individual pair-wise comparisons of the slopes were accomplished with preplanned contrasts. Each contrast was statistically significant ( $p < .0001$ ). Hence, the slopes are significantly different. Maximum C-peptide has the greatest reduction across time.

## SUPPLEMENTARY DATA

**Supplementary Table 3.** Variables Considered in Univariable Models

|                                                                                  |
|----------------------------------------------------------------------------------|
| Age (years)                                                                      |
| Age (categorical)<br>12 or under<br>Between 12 and 17<br>Over 17                 |
| Race<br>Asian<br>Black/ African American<br>White<br>More than one race<br>Other |
| Ethnicity<br>Hispanic or Latino<br>Not Hispanic or Latino                        |
| Gender<br>Male<br>Female                                                         |
| Duration of T1D (days)                                                           |
| Other autoimmune disease<br>Yes<br>No                                            |
| BMI                                                                              |
| zBMI                                                                             |
| HLA<br>DR3 or DR4; not DQB1*0602<br>Not DR3 or DR4; or with DQB1*0602            |
| HbA1c                                                                            |
| Insulin dose (units/kg)                                                          |
| mIAA (titer)                                                                     |
| mIAA (% positive)                                                                |
| GAD65 (titer)                                                                    |
| GAD65 (% positive)                                                               |
| ICA512 (titer)                                                                   |
| ICA512 (% positive)                                                              |
| ICA (titer)                                                                      |
| ICA (% positive)                                                                 |
| CBC                                                                              |
| Red blood cell count                                                             |
| Hemoglobin                                                                       |
| Hematocrit                                                                       |
| MCV                                                                              |
| Platelet count                                                                   |
| MCH                                                                              |
| MCHC                                                                             |
| White blood cell count                                                           |
| Pmnleuk                                                                          |
| Lymphocytes                                                                      |
| Monocytes                                                                        |
| Eosinophiles                                                                     |
| Basophils                                                                        |

# SUPPLEMENTARY DATA

## Supplementary Figure 1.

Individual trajectories in C-peptide AUC  
Nine Age Cohorts of Approximately Equal Numbers

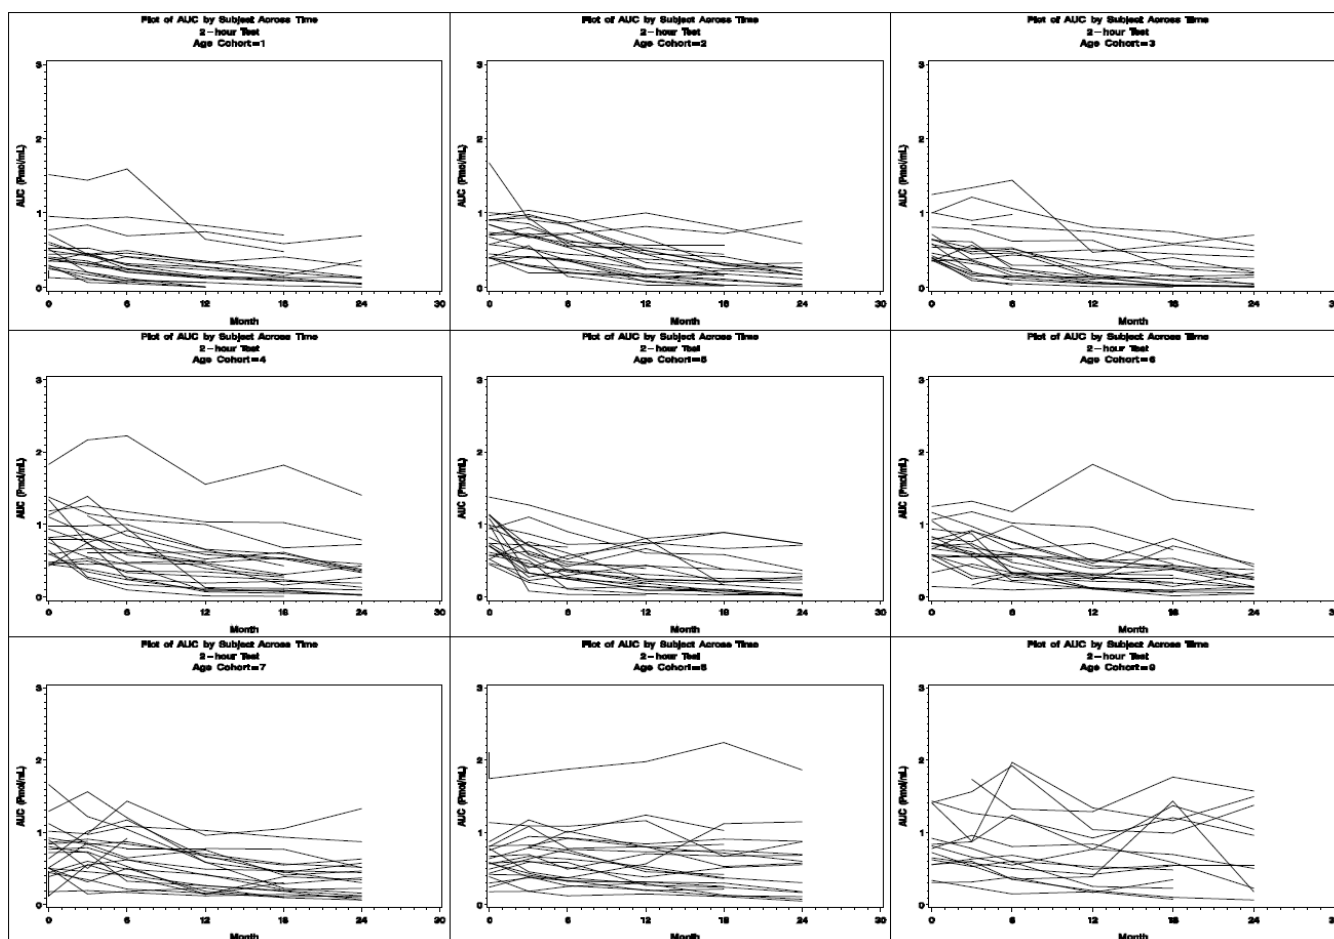

### Literature Cited:

Muggeo, VM: Estimating regression models with unknown break-points. *Stat Med* 22:3055-3071, 2003.
